# Supplementary material
Source: MDPI journal article supplement (https://www.mdpi.com/2673-9992/14/1/133)
Supplement: s1 [file s1]

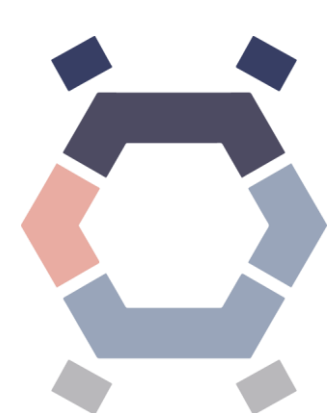

# Design, synthesis, and biological evaluation of new Benzoxaborole derivatives as potential antimycobacterial agents

Šlechta, P.,<sup>1</sup> Jand'ourek, O.,<sup>2</sup> Konečná, K.,<sup>2</sup> Paterová, P.,<sup>3</sup> Bárta, P.,<sup>4</sup> Kubíček, V.,<sup>4</sup> Doležal, M.,<sup>1</sup> Kučerová-Chlupáčová, M.<sup>1</sup>

<sup>1</sup>Department of Pharmaceutical Chemistry and Pharmaceutical Analysis, Faculty of Pharmacy in Hradec Králové, Charles University, Czech Republic

<sup>2</sup>Department of Biological and Medical Sciences, Faculty of Pharmacy in Hradec Králové, Charles University, Czech Republic

<sup>3</sup>Department of Clinical Microbiology, University Hospital Hradec Králové, Czech Republic

<sup>4</sup>Department of Biophysics and Physical Chemistry, Faculty of Pharmacy in Hradec Králové, Charles University, Czech Republic

## Introduction

Benzoxaborole moiety is an emerging scaffold in development of new antimicrobials after FDA approval of tavaborole as a new drug against onychomycosis. It has been proved, that benzoxaborole moiety may create spiro adducts with diols, therefore it may exhibit oxaborole tRNA trapping mechanism (OBORT).<sup>1</sup>

## Oxaborole tRNA trapping mechanism (OBORT)<sup>2</sup>

- Boron atom forms covalent bonds with the *cis*-diols of the 3'-terminal adenosine nucleotide Ade76 of tRNA<sup>Leu</sup>.
- Resulting adduct traps the 3' end of tRNA in the editing site in a nonproductive complex.
- This causes inhibition of leucylation and thereby protein synthesis.
- **Inhibits leucyl-tRNA synthetase (LeuRS).**

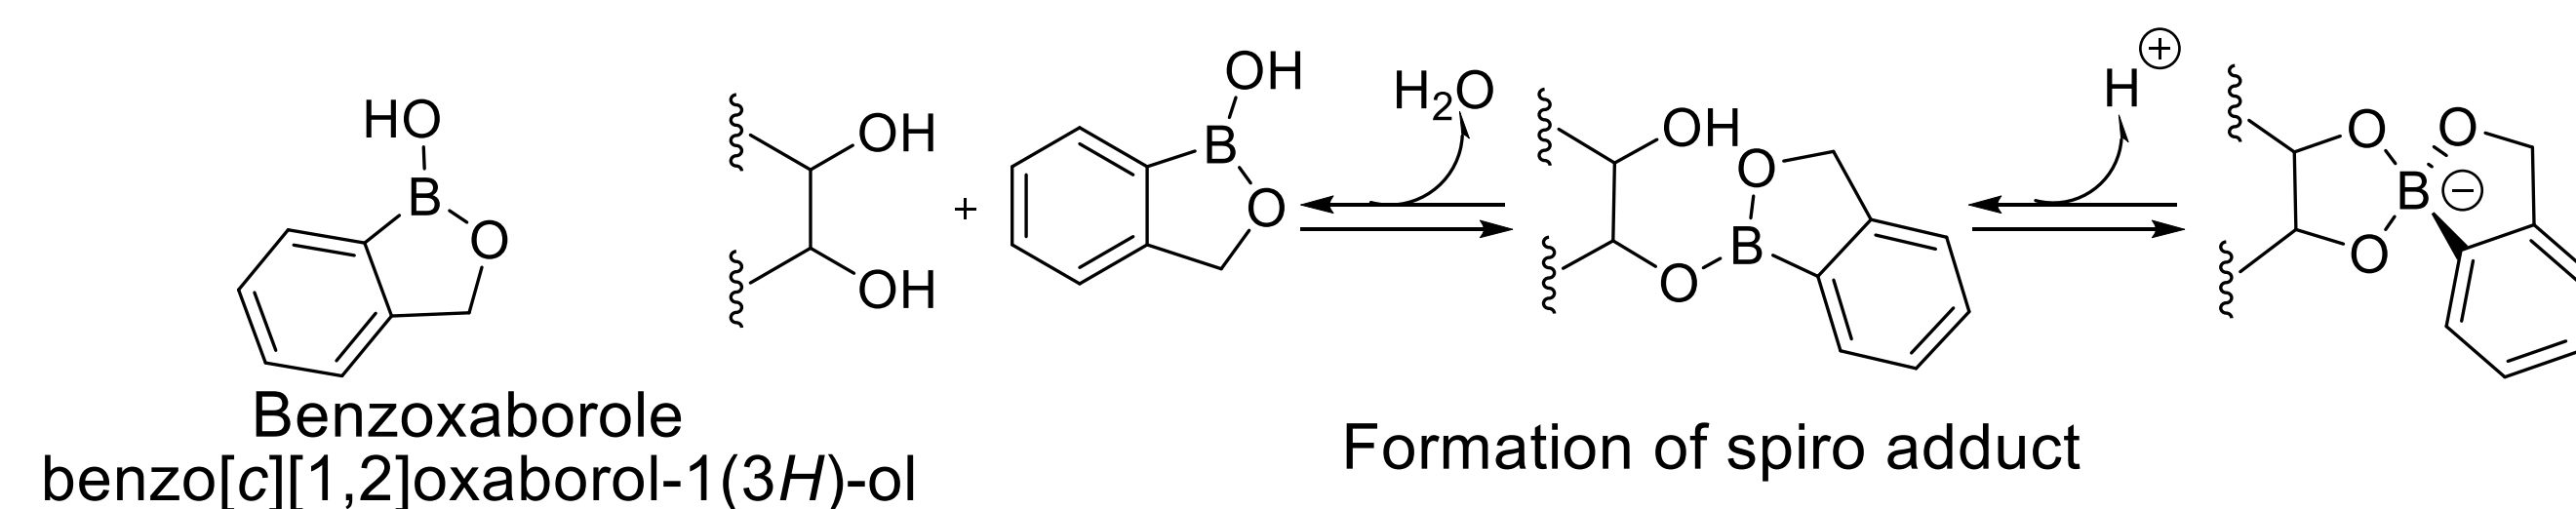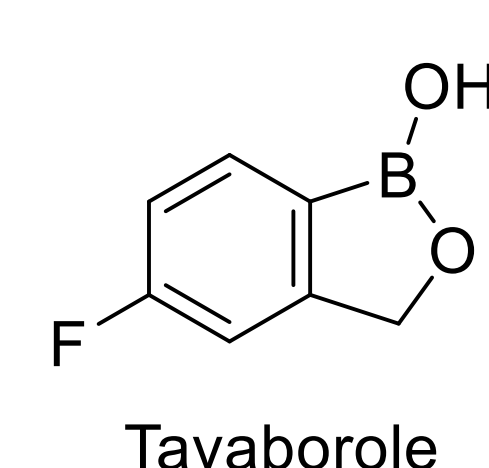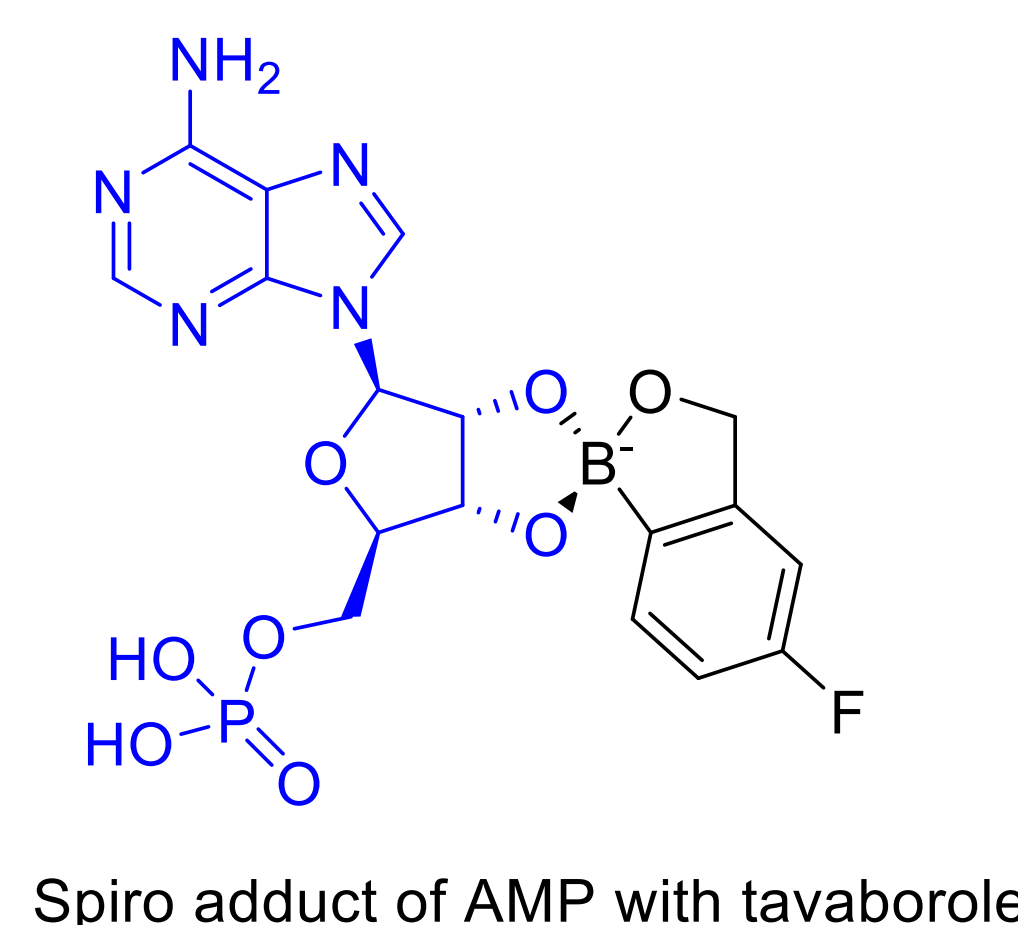

## In Silico studies

By superposition of human cytosolic LeuRS and *M. tuberculosis* LeuRS we found out, that there is a key difference between editing site of human (PDB ID: 2WFD) and *M. tuberculosis* LeuRS (PDB ID: 5AGR). Human LeuRS has an extra alpha-helix (R<sup>457</sup>EKLAEAKEKIYKGFYE<sup>474</sup>) that closes over the active site of enzyme. LeuRS of *M. tuberculosis* missing this extra alpha helix, this makes the active pocket wider and leaves space for substitution.

We conclude, that largely substituted benzoxaborole derivatives in position 6 could lead to active and yet selective compounds.

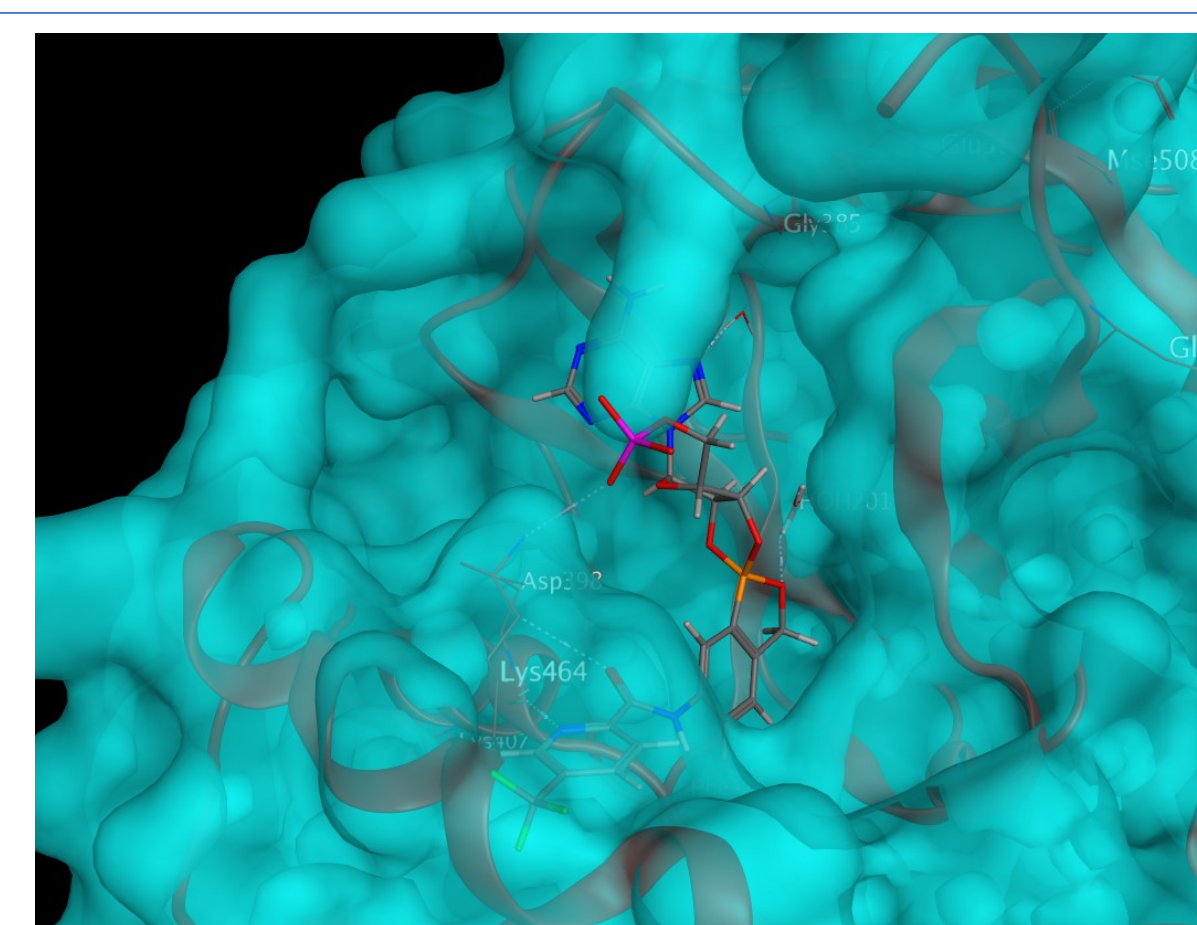

PDB ID: 2WFD

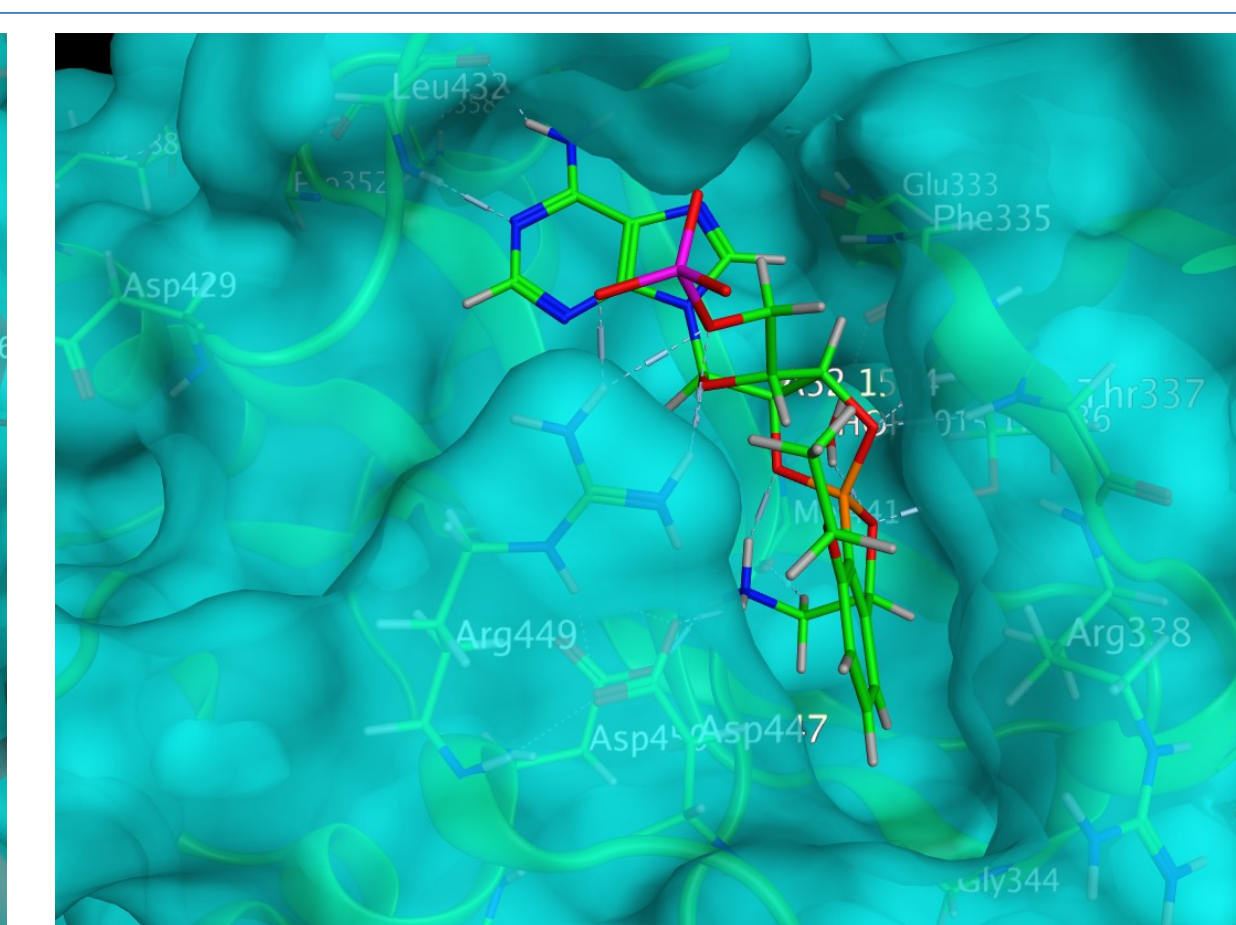

PDB ID: 5AGR

## Design of new compounds

According to our hypothesis from *in silico* studies, we have created a library of different largely substituted benzoxaborole derivatives and their adducts with AMP. Template docking proved us that large substitution in position 6 should smoothly fit in active site of LeuRS of *M. tuberculosis* and few heterocyclic candidates showed promising H-bond interaction with Asp447 through water molecule. Interaction with the same amino acid's residue can be observed in series of aminomethyl substituted benzoxaborole derivatives in position 3.<sup>3</sup>

By superpositioning our docking results and human cytosolic LeuRS we observed serious steric clashes with the extra alpha helix.

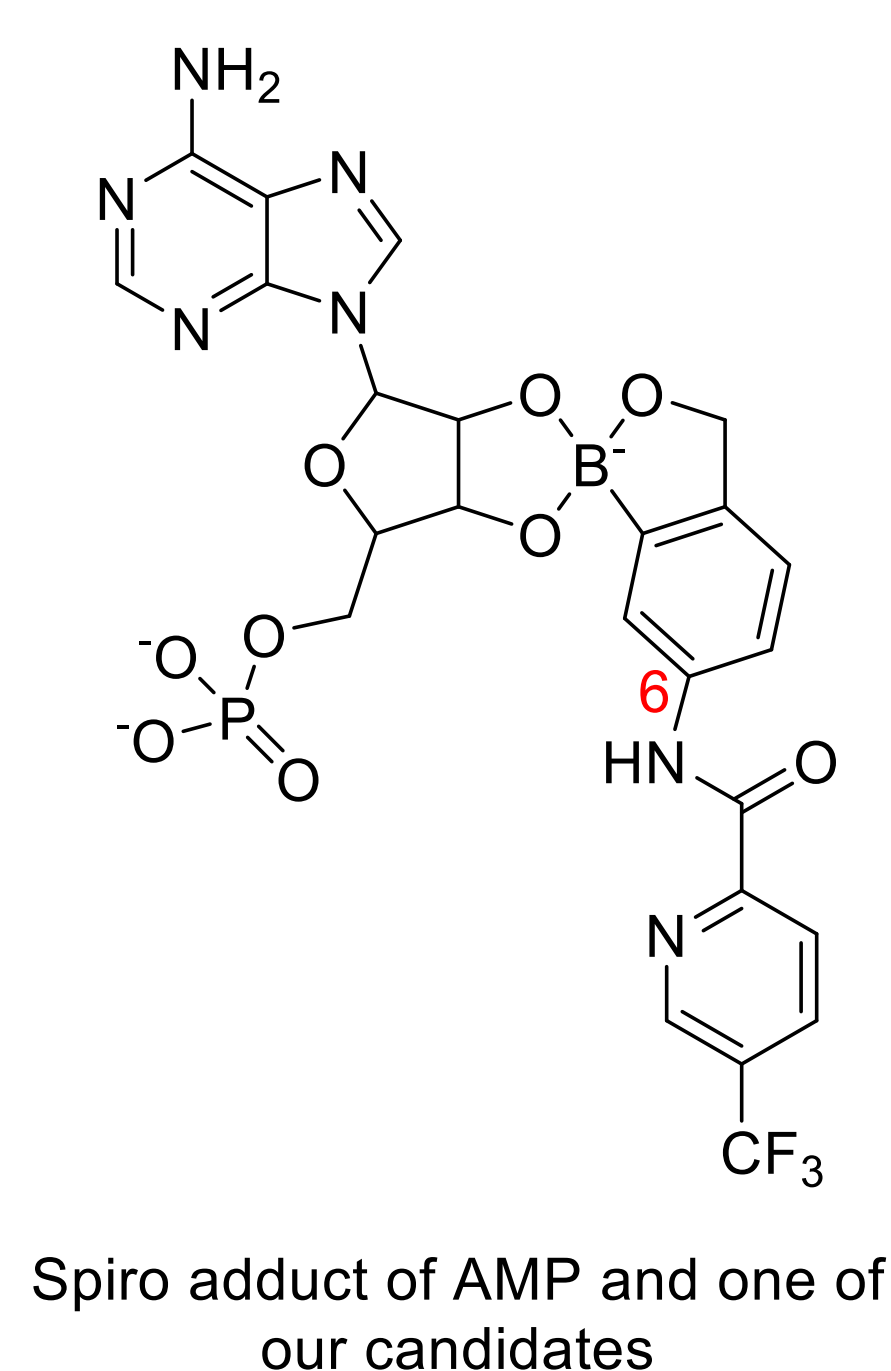

Spiro adduct of AMP and one of our candidates

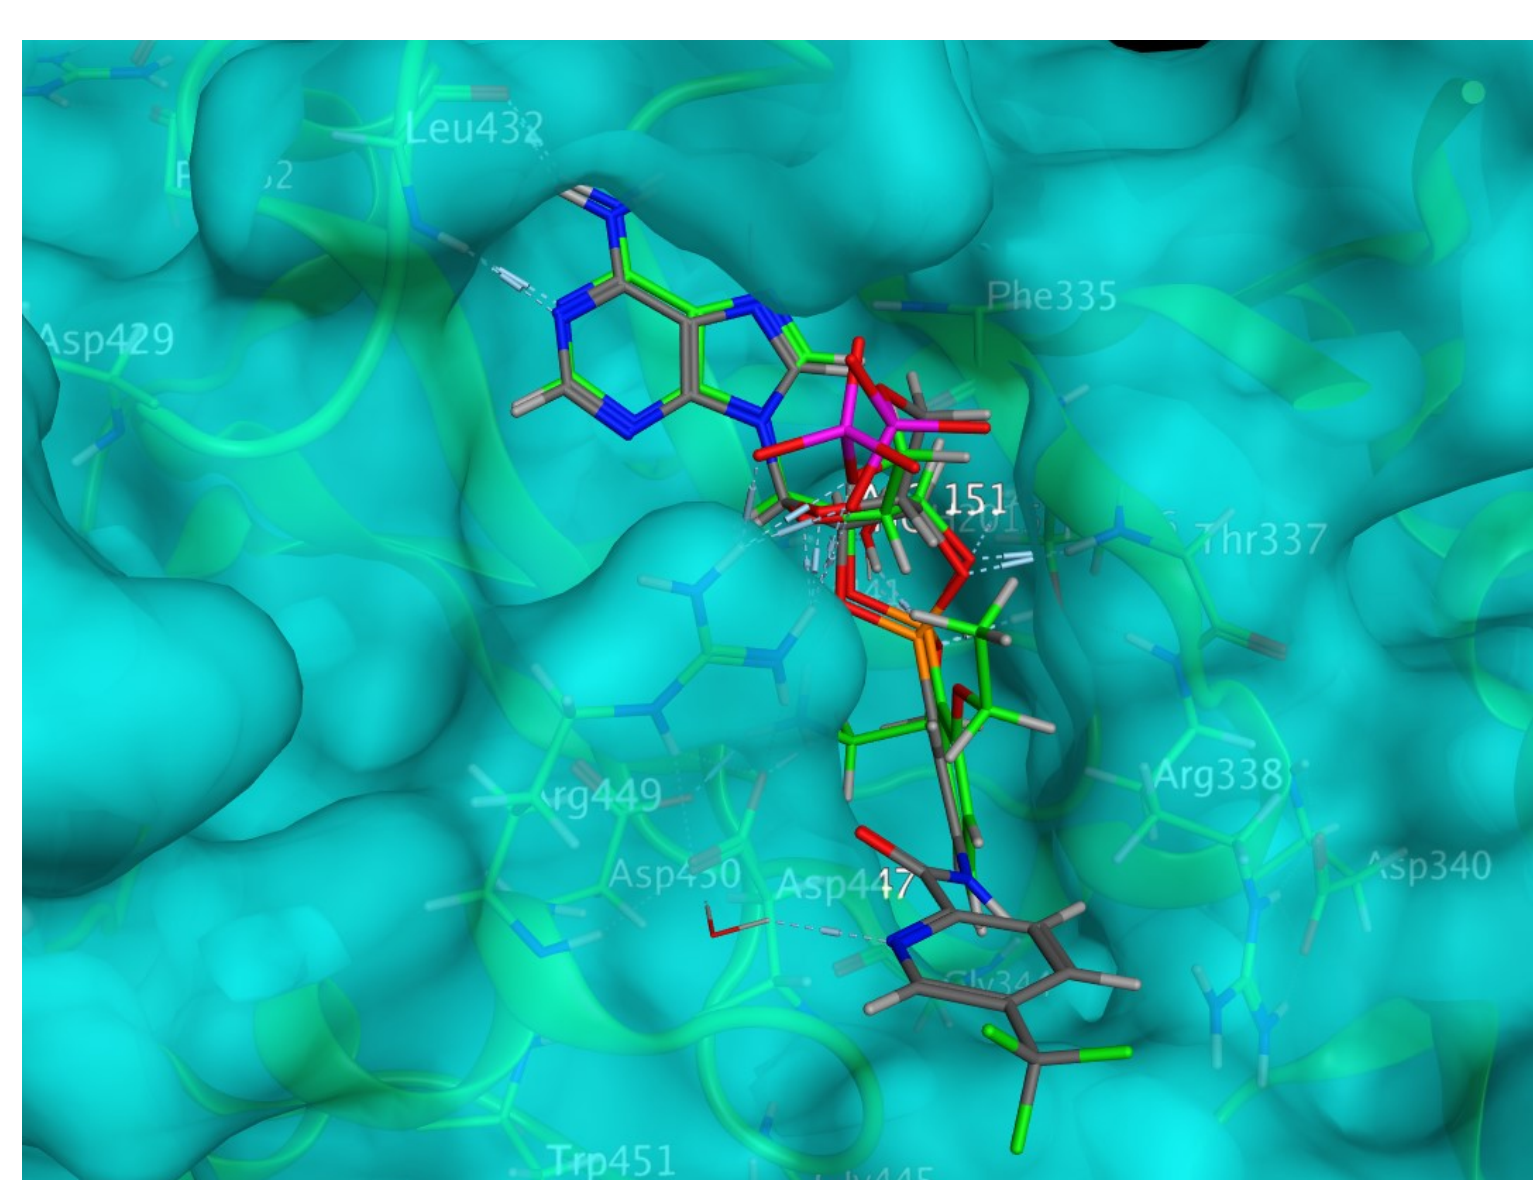

PDB ID: 5AGR (superposition of cocrystallized ligand in green with our docking candidate in gray)

## Results and discussion

- 
- Pyrazine with lipophilic substitution in position 5 leads to increase of activity. Lipophilic substitution in any other position leads to decrease of activity.
- 
- Any hydrophilic substitution of pyrazine or pyridine ring leads to decrease of activity.
- 
- Activity of pyridine derivatives depends on the position of substitution. 2-Pyridyl derivative substituted in position 5 with lipophilic substituents shows high activity.
- 
- 3-Pyridyl derivative substituted in position 6 with the same substituents shows decreased activity. The same phenomenon can be observed with hydrophilic substitution.
- 
- Quinoxaline substitution leads to lost of activity against *Mtb* H37Ra with persisted high activity against *Mtb* H37Rv. Quinoline substitution leads to moderate activity against both strains.

Presented series showed promising activity against different mycobacterial strains.

Presented series kept its activity against clinical isolates of MDR strains of *Mycobacterium tuberculosis*.

All tested compounds did not exert any activity against tested strains of bacteria and fungi.

The most active compound was PS-BZX-12 with MIC value 9.72  $\mu$ M against *M. tuberculosis* H37Rv. This compound did not show toxicity against HepG2 cancer cell line.

## Synthetic scheme

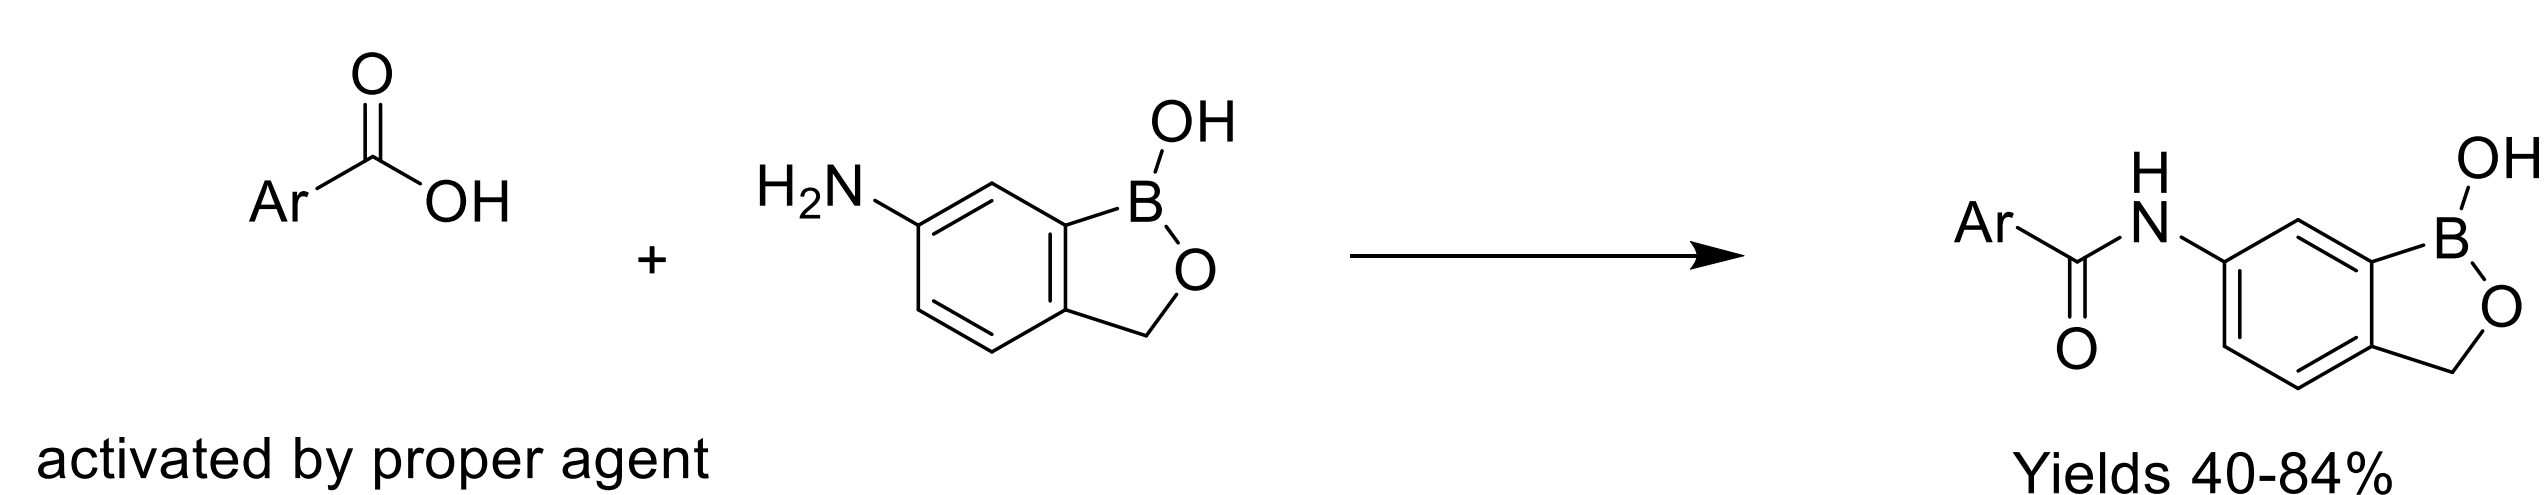

## References

1. Berube, M., Dowlut, M. & Hall, D.G. Benzoboroxoles as efficient glycopyranoside-binding agents in physiological conditions: Structure and selectivity of complex formation. *Journal of Organic Chemistry* **73**, 6471-6479 (2008).
2. Rock, F.L. et al. An antifungal agent inhibits an aminoacyl-tRNA synthetase by trapping tRNA in the editing site. *Science* **316**, 1759-1761 (2007).
3. Palencia, A. et al. Discovery of Novel Oral Protein Synthesis Inhibitors of Mycobacterium tuberculosis That Target Leucyl-tRNA Synthetase. *Antimicrobial Agents and Chemotherapy* **60**, 6271-6280 (2016).

ECMC  
2022

The 8th International Electronic  
Conference on Medicinal Chemistry  
01-30 NOVEMBER 2022 | ONLINE
